# Supplementary material for: Anti-Inflammatory and Antioxidant Effects of Carvacrol on N-Methyl-N′-Nitro-N-Nitrosoguanidine (MNNG) Induced Gastric Carcinogenesis in Wistar Rats
Source: MDPI journal article supplement (doi:10.3390/nu14142848), 2022-07-12
Supplement: s1 [file s1]

## Supplementary Material

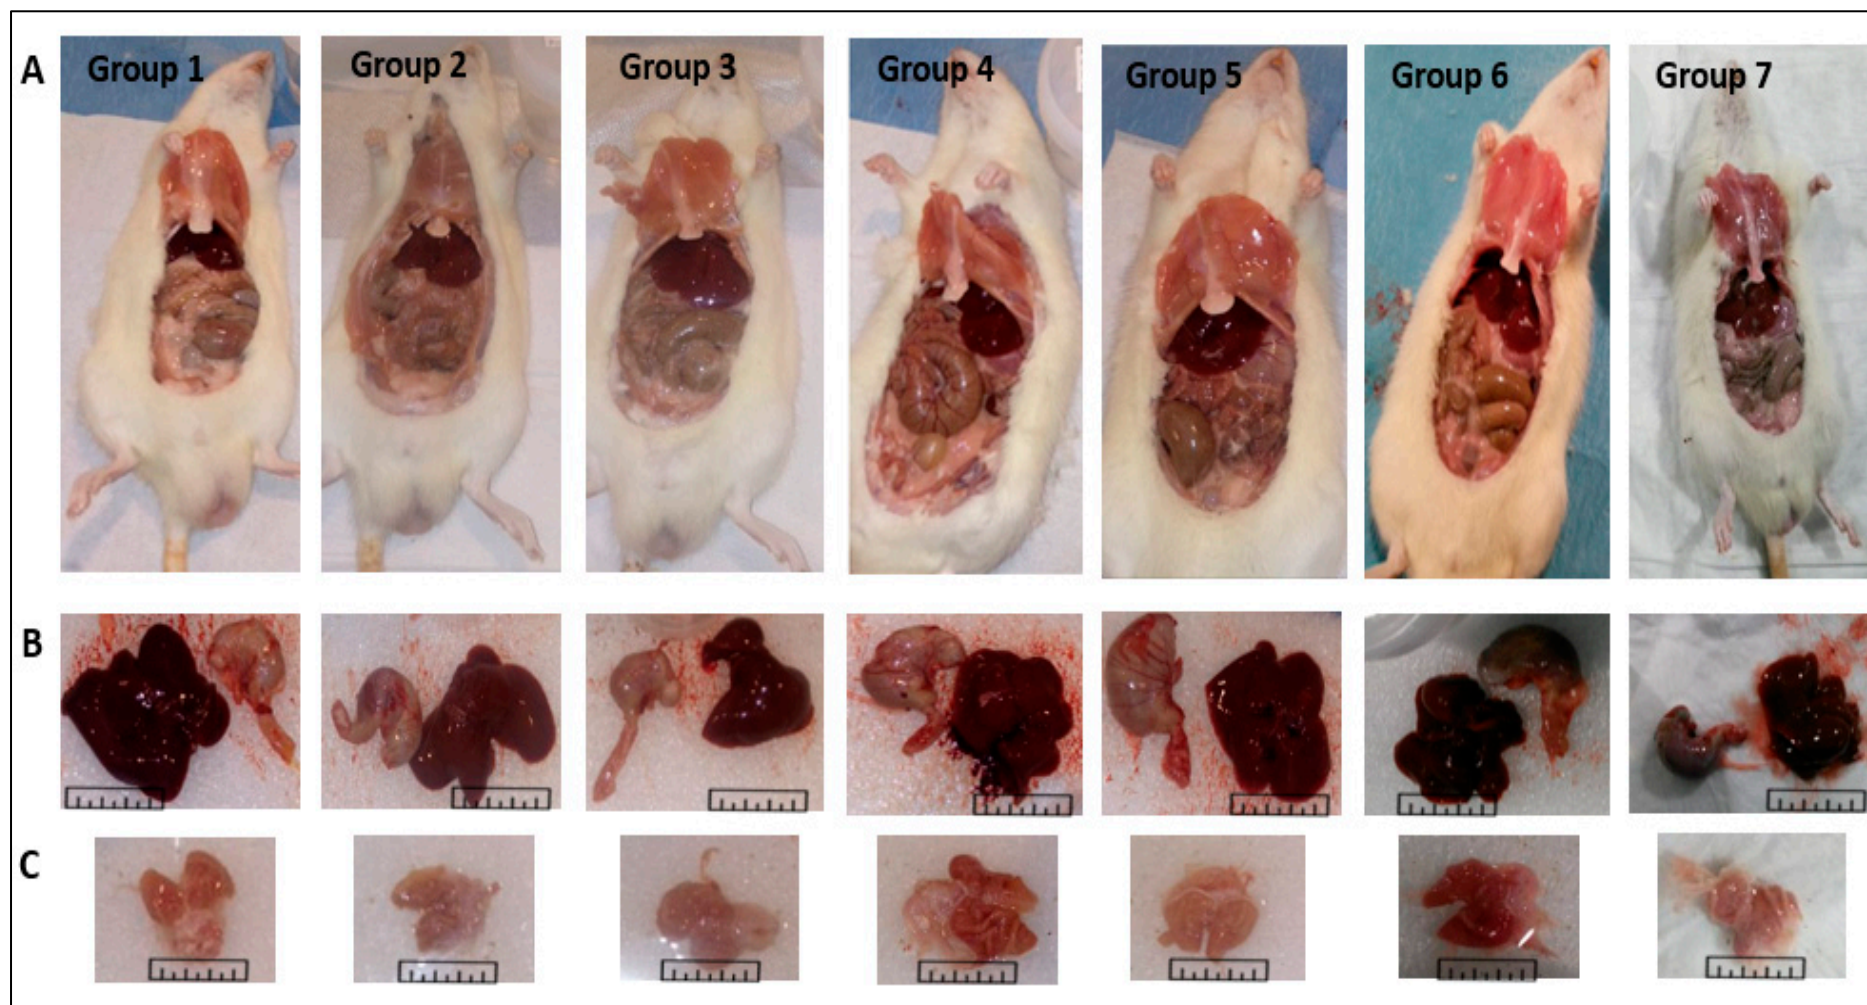

**Supplementary Figure S1.** Appearance of body (A), organs (B) and tissues (C) from all group representative Wistar rats at necropsy. Size of organs was presented with scale bars.
